# Supplementary material for: The synergistic effect of treatment with triptolide and MK-801 in the rat neuropathic pain model
Source: PubMed Central journal article supplement — Mol Pain. 2017 Nov 22;13:1744806917746564. doi: 10.1177/1744806917746564 (PMC5734437; doi:10.1177/1744806917746564), 2017-11-22

# Open field test

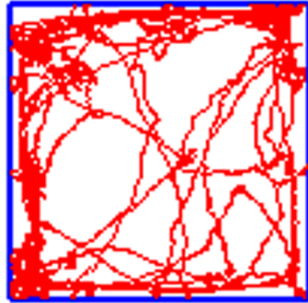

Sham  
Before administration

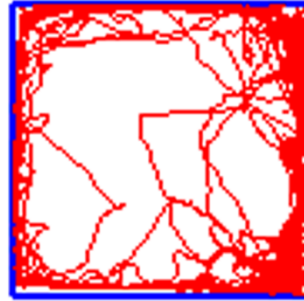

Sham  
1 w administration

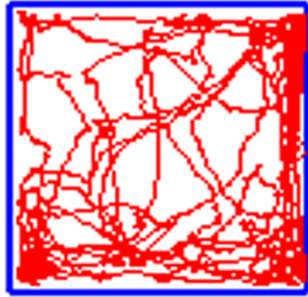

MK-801  
Before administration

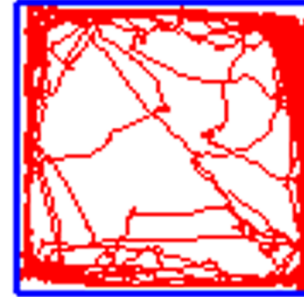

MK-801  
1 w administration

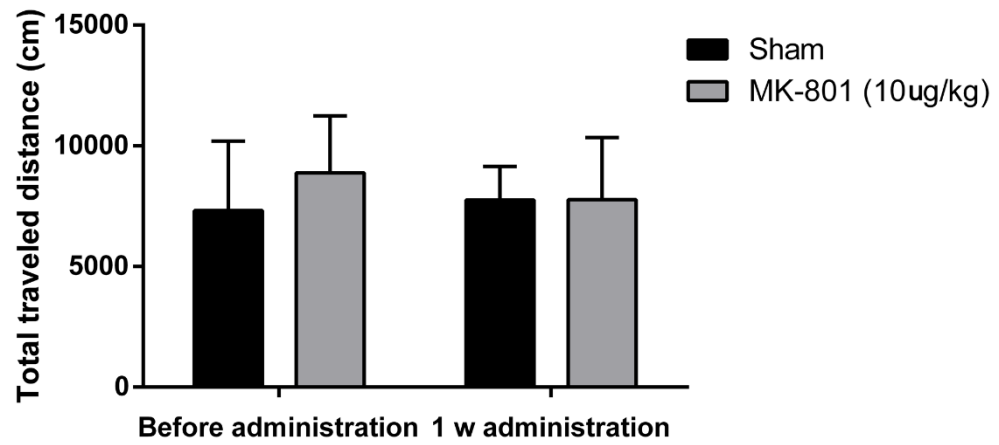

Supplement: Supplementary_figure.pdf [file Supplementary_figure.pdf]
